# Supplementary material for: Prophylactic total pancreatectomy in individuals at high risk of pancreatic ductal adenocarcinoma (PROPAN): systematic review and shared decision-making programme using decision tables
Source: PubMed Central journal article supplement — United European Gastroenterol J. 2020 Jul 23;8(8):865–77. doi: 10.1177/2050640620945534 (PMC7707864; doi:10.1177/2050640620945534), 2020-07-23
Supplement: sj-pdf-1-ueg-10.1177_2050640620945534.pdf [file sj-pdf-1-ueg-10.1177_2050640620945534.pdf]

## SUPPLEMENTARY MATERIALS

### Appendix 1. Search strategy of systematic review about prophylactic total pancreatectomy

| Database                                   | Syntax                                                                                                                                                                                                                                                                          | Hits       |
|--------------------------------------------|---------------------------------------------------------------------------------------------------------------------------------------------------------------------------------------------------------------------------------------------------------------------------------|------------|
| Pubmed                                     | "Prophylactic Surgical Procedures "[Mesh] OR prophylactic AND total pancreatectomy                                                                                                                                                                                              | <b>38</b>  |
| Embase (Ovid)                              | <ol style="list-style-type: none"> <li>1. total pancreatectomy/</li> <li>2. exp pancreas resection/</li> <li>3. prophylactic.mp. or exp prophylactic surgical procedure/</li> <li>4. 1 or 2</li> <li>5. 3 and 4</li> </ol>                                                      | <b>151</b> |
| Cochrane library                           | <ol style="list-style-type: none"> <li>#1 MeSH descriptor: [Phrophylactic Surgical procedures] explode all trees</li> <li>#2 total pancreatectomy</li> <li>#3 prohylactic</li> <li>#4 pancreatectomy</li> <li>#5 #1 or #3</li> <li>#6 #2 or #4</li> <li>#7 #5 and #6</li> </ol> | <b>26</b>  |
| <b>Total number of identified articles</b> |                                                                                                                                                                                                                                                                                 | <b>213</b> |

**Appendix 2. Search strategy of systematic review about individuals at high-risk for pancreatic cancer**

| Database                                   | Syntax                                                                                                                                                                                                                                                                                                                                                                                                                                                                                                                                                                                                                                                              | Hits       |
|--------------------------------------------|---------------------------------------------------------------------------------------------------------------------------------------------------------------------------------------------------------------------------------------------------------------------------------------------------------------------------------------------------------------------------------------------------------------------------------------------------------------------------------------------------------------------------------------------------------------------------------------------------------------------------------------------------------------------|------------|
| <b>Pubmed</b>                              | "pancreatic neoplasms"[MeSH Terms] OR ("pancreatic neoplasms"[MeSH Terms] OR ("pancreatic"[All Fields] AND "neoplasms"[All Fields]) OR "pancreatic neoplasms"[All Fields] OR ("pancreatic"[All Fields] AND "cancer"[All Fields]) OR "pancreatic cancer"[All Fields]) AND (high-risk[All Fields] AND ("pancreatic neoplasms"[MeSH Terms] OR ("pancreatic"[All Fields] AND "neoplasms"[All Fields]) OR "pancreatic neoplasms"[All Fields] OR ("pancreatic"[All Fields] AND "cancer"[All Fields]) OR "pancreatic cancer"[All Fields])) AND (("genes"[MeSH Terms] OR "genes"[All Fields] OR "gene"[All Fields]) AND ("mutation"[MeSH Terms] OR "mutation"[All Fields])) | <b>113</b> |
| Embase (Ovid)                              | <ol style="list-style-type: none"> <li>1. total pancreatectomy/</li> <li>2. exp pancreas resection/</li> <li>3. prophylactic.mp. or exp prophylactic surgical procedure/</li> <li>4. 1 or 2</li> <li>5. 3 and 4</li> </ol>                                                                                                                                                                                                                                                                                                                                                                                                                                          | <b>151</b> |
| Cochrane library                           | <p>#1 MeSH descriptor: [Phrophylactic Surgical procedures] explode all trees</p> <p>#2 total pancreatectomy</p> <p>#3 prohylactic</p> <p>#4 pancreatectomy</p> <p>#5 #1 or #3</p> <p>#6 #2 or #4</p> <p>#7 #5 and #6</p>                                                                                                                                                                                                                                                                                                                                                                                                                                            | <b>0</b>   |
| <b>Total number of identified articles</b> |                                                                                                                                                                                                                                                                                                                                                                                                                                                                                                                                                                                                                                                                     | <b>189</b> |

### Appendix 3. Search strategy of systematic review about outcomes after total pancreatectomy

| Database                                   | Syntax                                                                                                                                                                                                            | Hits        |
|--------------------------------------------|-------------------------------------------------------------------------------------------------------------------------------------------------------------------------------------------------------------------|-------------|
| <b>Pubmed</b>                              | "total pancreatectomy"[tiab]                                                                                                                                                                                      | 1610        |
| <b>Embase (Ovid)</b>                       | 1. total pancreatectomy.mp. [mp=title, abstract, heading word, drug trade name, original title, device manufacturer, drug manufacturer, device trade name, keyword]<br><br>2. limit 1 to exclude medline journals | 66          |
| <b>Cochrane library</b>                    | #1 total pancreatectomy                                                                                                                                                                                           | 85          |
| <b>Total number of identified articles</b> |                                                                                                                                                                                                                   | <b>1761</b> |

#### Appendix 4. Search strategy of systematic review about minimally invasive total pancreatectomy

| Database                                   | Syntax                                                                                                                                                                                                                                                                                                                                                                                                       | Hits      |
|--------------------------------------------|--------------------------------------------------------------------------------------------------------------------------------------------------------------------------------------------------------------------------------------------------------------------------------------------------------------------------------------------------------------------------------------------------------------|-----------|
| <b>Pubmed</b>                              | "minimally invasive surgical procedures"[MeSH Terms] OR minimally invasive surgery[Text Word] OR laparoscopic AND total pancreatectomy [TIAB]                                                                                                                                                                                                                                                                | 104       |
| Embase (Ovid)                              | <ol style="list-style-type: none"> <li>1. exp minimally invasive surgery/</li> <li>2. minimally invasive surgical procedures.mp. or exp minimally invasive surgery/</li> <li>3. exp laparoscopic surgery/</li> <li>4. exp pancreas resection/</li> <li>5. 1 or 2 or 3</li> <li>6. total pancreatectomy.mp.</li> <li>7. 4 or 6</li> <li>8. 5 and 7</li> <li>9. limit 8 to exclude medline journals</li> </ol> | <b>75</b> |
| Cochrane library                           | <ol style="list-style-type: none"> <li>#1 MeSH descriptor: [minimally invasive surgical procedures]</li> <li>#2 minimally invasive surgery</li> <li>#3 laparoscopic surgery</li> <li>#4 total pancreatectomy</li> <li>#5 pancreatectomy</li> <li>#5 #1 or #2 or #3</li> <li>#6 #4 or #5</li> <li>#7 #6 and #6</li> </ol>                                                                                     | <b>85</b> |
| <b>Total number of identified articles</b> |                                                                                                                                                                                                                                                                                                                                                                                                              | <b>10</b> |
